# Supplementary material for: Unveiling the supramolecular assembly of a novel antimony(iii)-based co-crystal: integrating multi-spectroscopic analyses, DFT calculations, and advanced biological evaluations
Source: Royal Society of Chemistry journal article supplement (doi:10.1039/d6ra01859a), 2026-05-13
Supplement: d6ra01859a1.pdf [file d6ra01859a1.pdf]

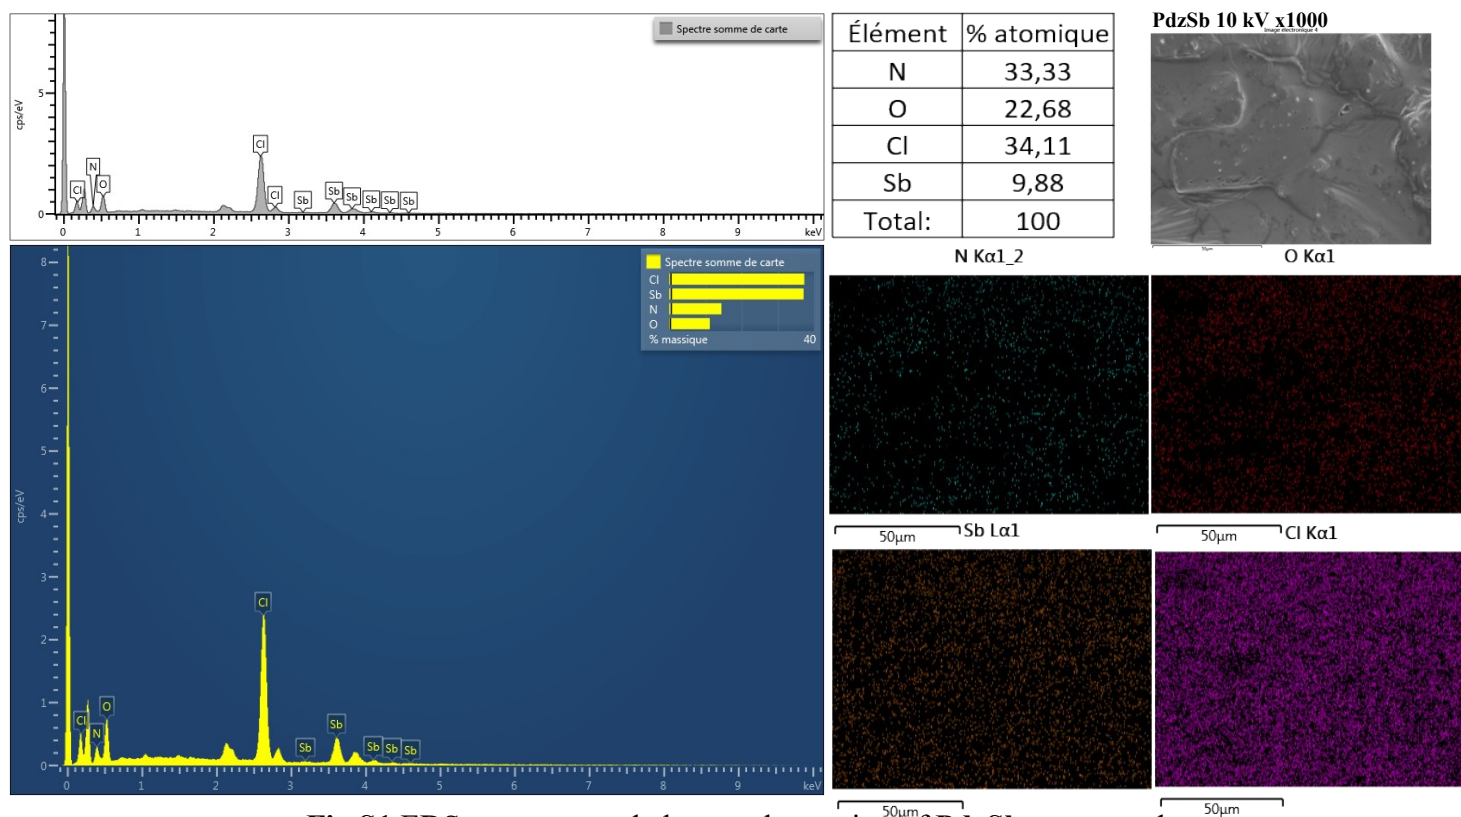

Fig S1.EDS spectrum and elemental mapping of PdzSb compound.

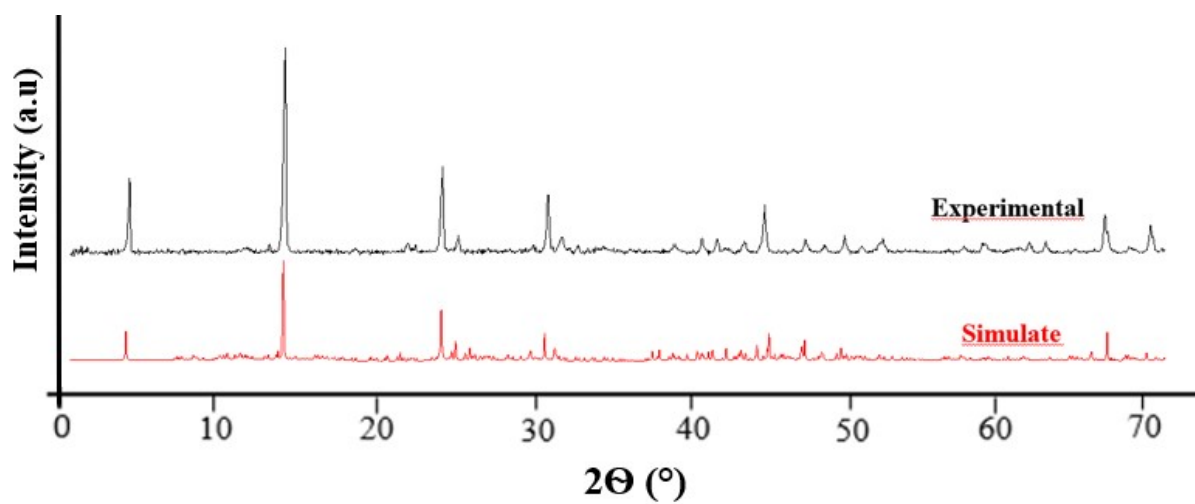

**Fig. S2.** PXRD pattern with experimental (black) and simulated (red) data of **PdZSb** compound.

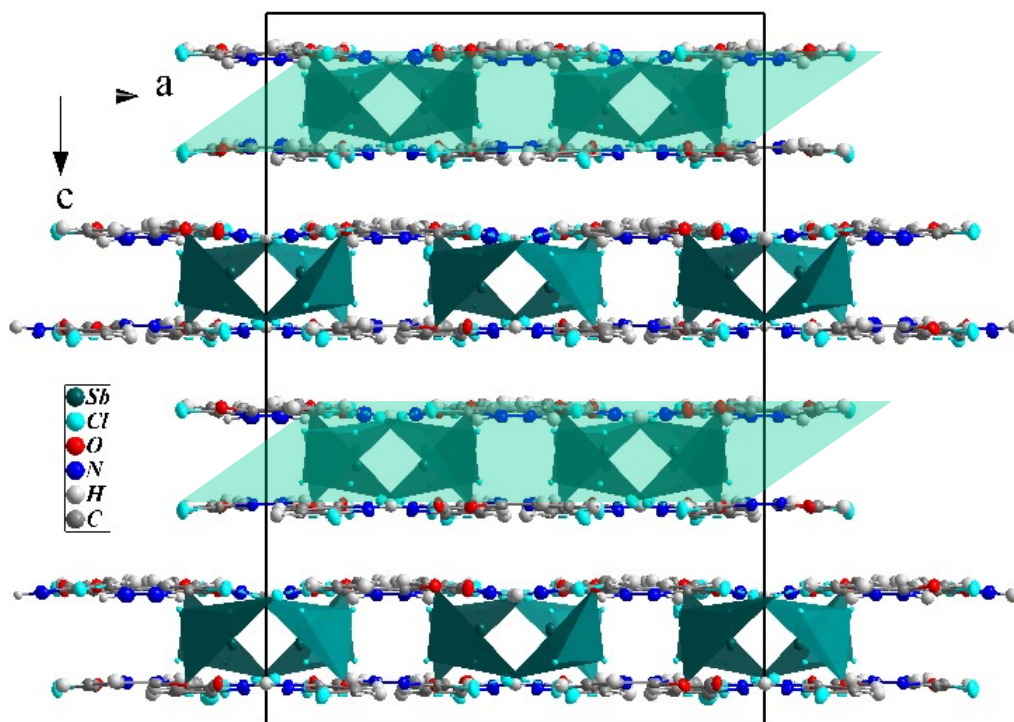

Fig. S3. Other projection of the **PdZSb** co-crystal in (ac) plan.

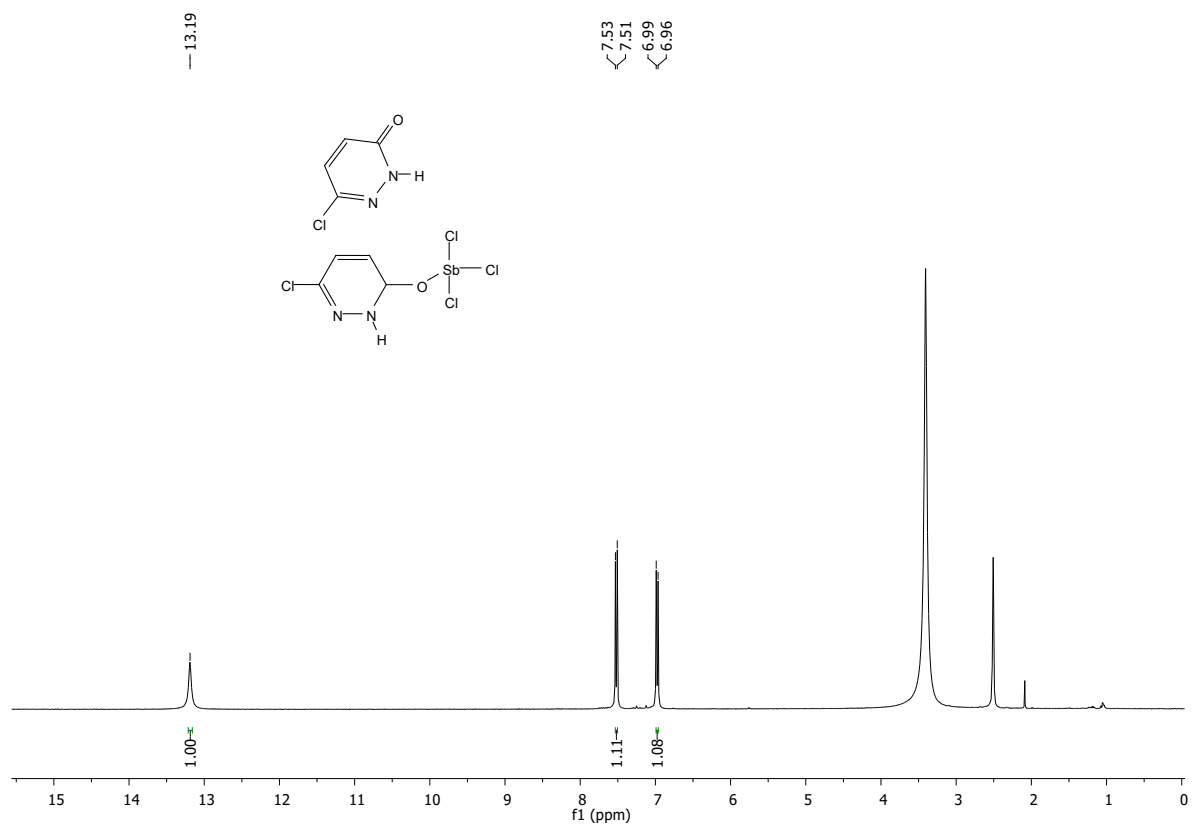

**Fig. S4.** NMR  $^1\text{H}$  (400 MHz, DMSO- $d_6$ )

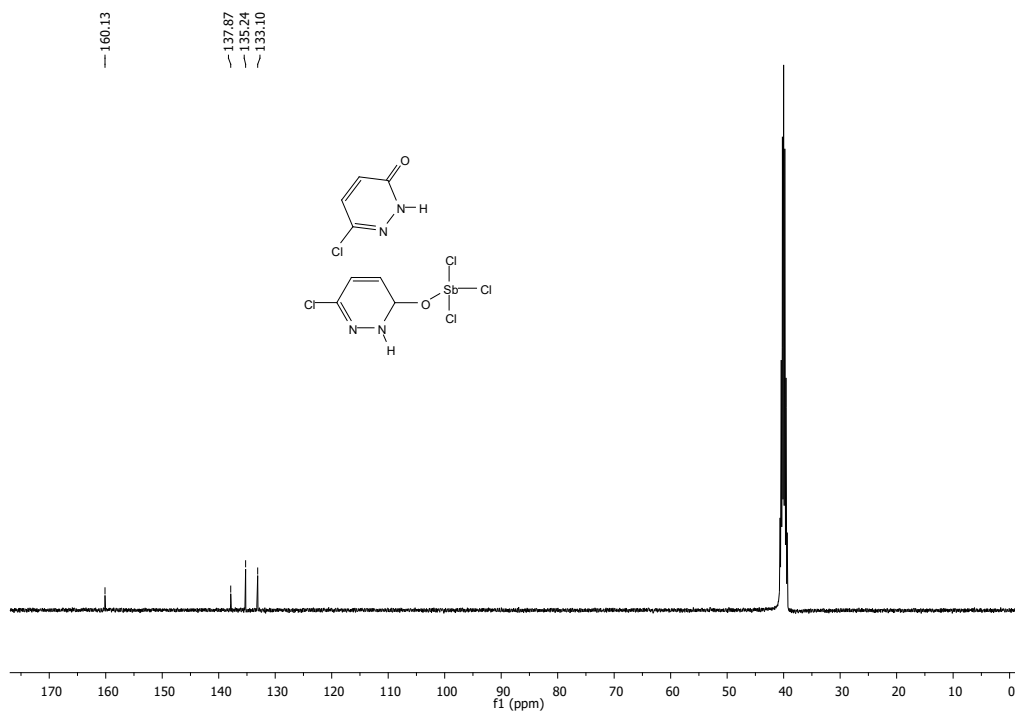

**Fig. S5.** NMR  $^{13}\text{C}$  (100 MHz, DMSO- $\text{d}_6$ )

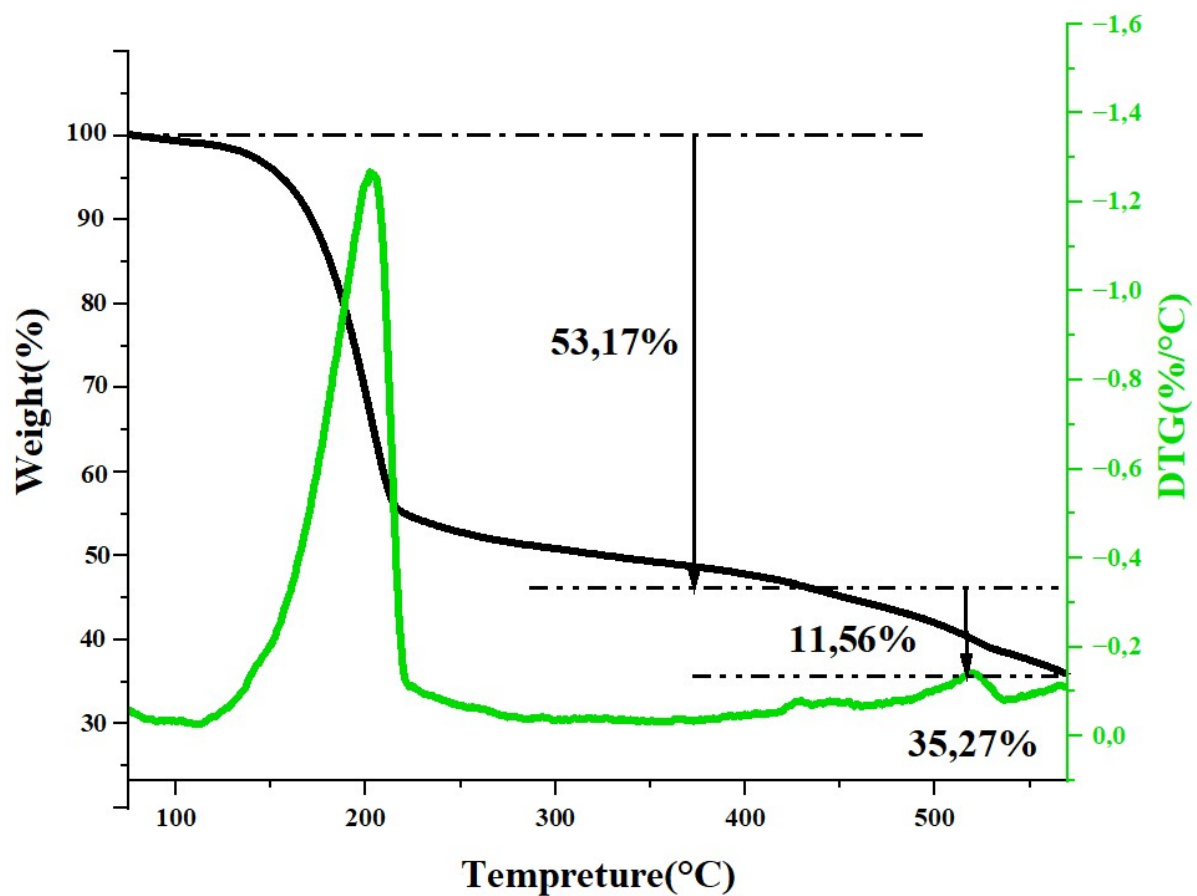

Fig. S6. TGA-DTG analysis plots of Pd<sub>2</sub>Sb cocystal.

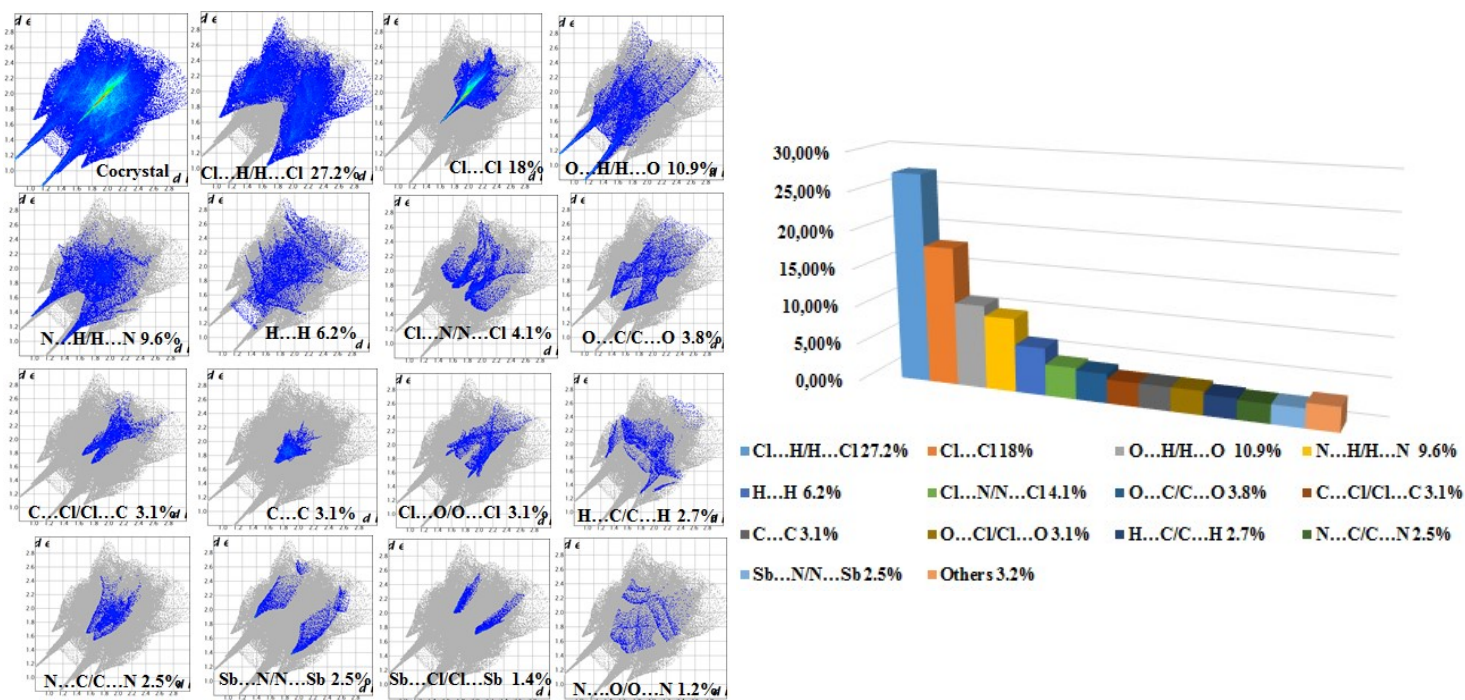

**Fig. S7.** 2D fingerprint plots of the cocrystal and relative contributions of different intermolecular contacts to the Hirshfeld surface.

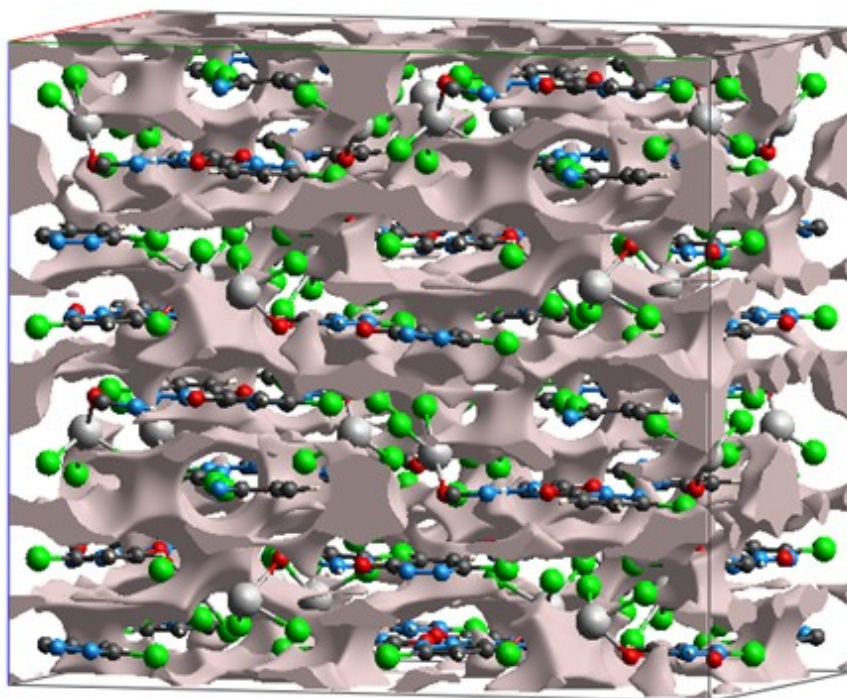

**Fig. S8.** 3D graphical view of voids in the crystal packing of the **PdZnSb**.

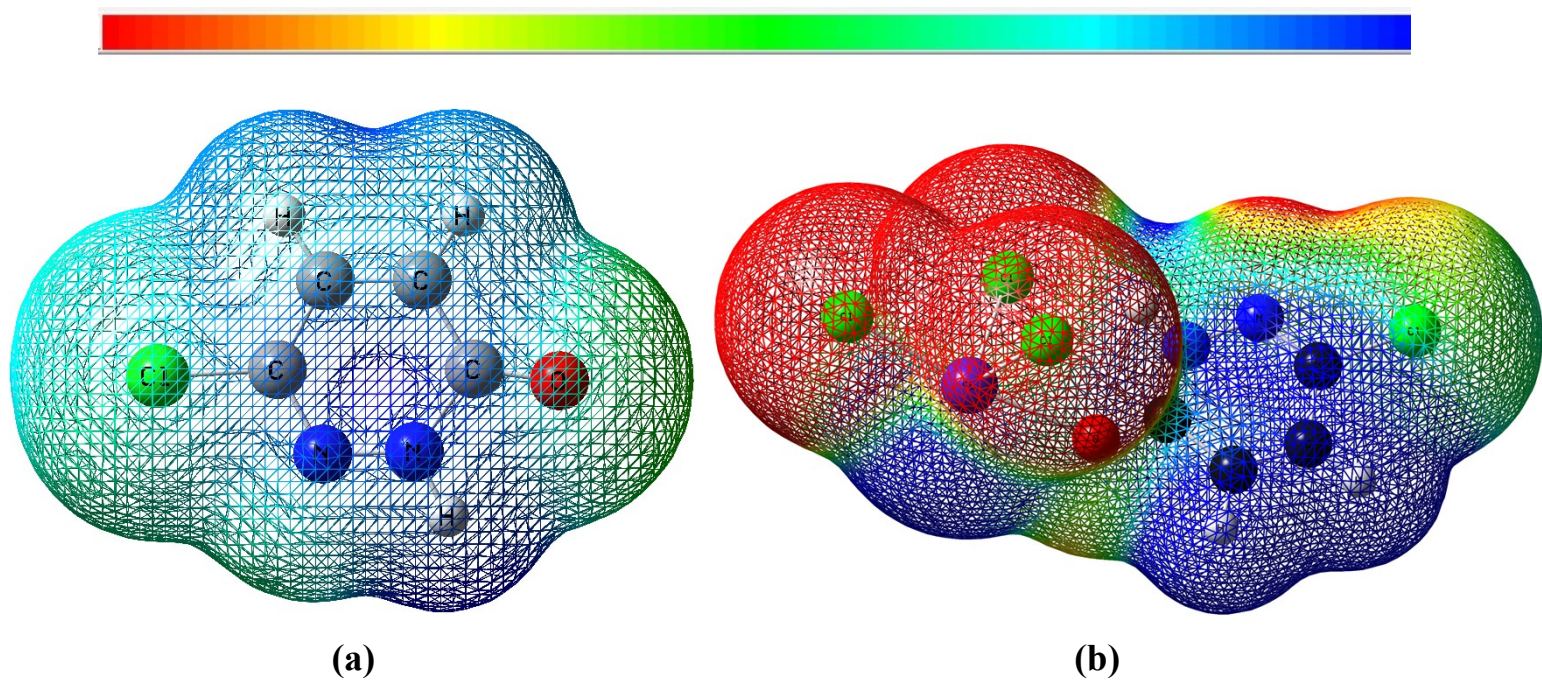

**Fig. S9.** Molecular electrostatic potential (MEP) surfaces of the individual molecules (a) and (b), showing the localized charge distribution and the regions involved in intermolecular interactions. with values given in arbitrary units (a.u.).

**Table S1:** Selected bond lengths (Å) and angles (°) in anionic part of **PdzSb**.

| <b>Distances (Å)</b> |             |                |             |
|----------------------|-------------|----------------|-------------|
| <b>Sb1—O1</b>        | 2.379 (5)   | <b>Sb2—Cl5</b> | 2.486 (18)  |
| <b>Sb1—Cl2</b>       | 2.3822 (19) | <b>Sb2—Cl6</b> | 2.3646 (18) |
| <b>Sb1—Cl3</b>       | 2.357 (2)   | <b>Sb2—Cl7</b> | 2.3727 (19) |
| <b>Sb1—Cl4</b>       | 2.493 (19)  | <b>Sb2—O8</b>  | 2.385 (5)   |

| <b>Angles (°)</b>  |            |                    |             |
|--------------------|------------|--------------------|-------------|
| <b>Cl3—Sb1—O1</b>  | 83.90 (15) | <b>Cl6—Sb2—Cl7</b> | 91.99 (7)   |
| <b>Cl3—Sb1—Cl2</b> | 92.65 (8)  | <b>Cl6—Sb2—O8</b>  | 84.16 (14)  |
| <b>O1—Sb1—Cl2</b>  | 85.22 (14) | <b>Cl7—Sb2—O8</b>  | 84.77 (14)  |
| <b>Cl3—Sb1—Cl4</b> | 91.91 (7)  | <b>Cl5—Sb2—Cl6</b> | 92.10 (7)   |
| <b>O1—Sb1—Cl4</b>  | 174.30 (8) | <b>Cl7—Sb2—Cl5</b> | 91.62 (6)   |
| <b>Cl2—Sb1—Cl4</b> | 91.13 (7)  | <b>O8—Sb2—Cl5</b>  | 174.69 (13) |

**Table S2:** The attributions of calculated and observed frequencies of the vibration modes of the **PdzSb** Co-Crystal.

| IR (cm <sup>-1</sup> ) | Raman (cm <sup>-1</sup> ) | Calc. Wavenumbers(cm <sup>-1</sup> ) | Assignment                    |
|------------------------|---------------------------|--------------------------------------|-------------------------------|
| 3456                   | -                         | 3402                                 | $\nu(N-H)$                    |
| 3381                   | -                         | 3391                                 | $\nu_{as}(C-H) + \nu_s(C-H)$  |
| 3182                   | -                         | 3198                                 | $\nu(N-H)$                    |
| 1680                   | 1662                      | 1673                                 | $\nu(C-O) + \beta(N-H)$       |
| 1620                   | 1605                      | 1615                                 | $\nu(C=O)$                    |
| 1548                   | -                         | 1537                                 | $\nu(C=C)$                    |
| 1437                   | 1422                      | 1433                                 | $\delta(N-H)$                 |
| 1298                   | 1307                      | 1283                                 | $\nu(C-C)$                    |
| 1228                   | 1233                      | 1237                                 | $\nu(C-Cl) + \nu(C-N)$        |
| 1149                   | 1155                      | 1158                                 | $\nu(N-N)$                    |
| 1118                   | 1122                      | 1123                                 | $\tau(C-H)$                   |
| 998                    | -                         | 990                                  | $\omega(C-H)$                 |
| 940                    | -                         | 944                                  | $\gamma(N-H)$                 |
| 847                    | 840                       | 845                                  | $\gamma(C-H)$                 |
| 670                    | 673                       | 666                                  | $\delta(N-C-C) + \delta(C-C)$ |
| 541                    | -                         | 536                                  | $\nu(Sb-O)$                   |
| -                      | 416                       | 400                                  | $\nu_s(Sb-O)$                 |
| -                      | 309                       | 311                                  | $\nu_s(Sb-O)$                 |
| -                      | 255                       | 260                                  | $\nu_s(Sb-Cl)$                |
| -                      | 190                       | 203                                  | $\nu_{as}(Sb-Cl)$             |
| -                      | 166                       | 168                                  | $\delta(Sb-Cl)$               |
| -                      | 130                       | 134                                  | $\delta(Sb-Cl)$               |
| -                      | 104                       | 106                                  | <b>Lattice Mode</b>           |

$\nu_s$ : symmetric stretching,  $\nu_{as}$ : asymmetric stretching,  $\beta$ : in plane bending,  $\gamma$ : out plane bending,  
 $\delta$ : scissoring,  $\omega$ : wagging,  $\tau$ : twisting

**Table S3:** Summary of Noncovalent Interactions and Corresponding Distances (Å) of the **PdzSb** Co-Crystal.

| Type of interactions | Distance (Å) |
|----------------------|--------------|
| $\pi$ - $\pi$        | 3.732- 3.873 |
| $\pi$ -Cl            | 3.658- 3.834 |
| Sb...Cl              | 3.430- 3.517 |
| O...Cl               | 3.470- 3.475 |
| Cl...Cl              | 3.213- 3.769 |
| Sb...N               | 3.232        |
| $\pi$ -O             | 2986- 3588   |

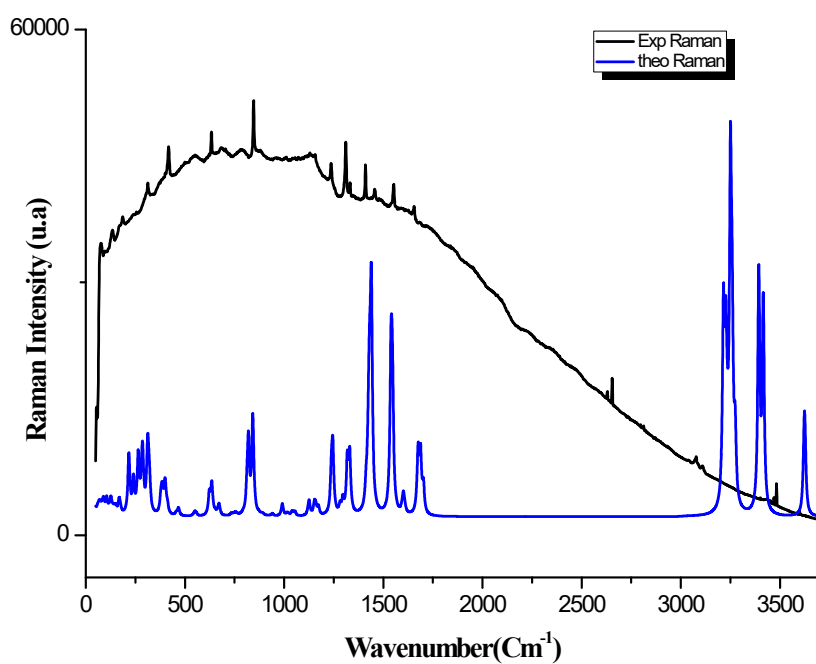

**Fig. S10.** Original Raman spectrum of the compound before background correction, showing the strong photoluminescence contribution.
